# Supplementary material for: Different clinical, virological, serological and tissue tropism outcomes of two new and one old Belgian type 1 subtype 1 porcine reproductive and respiratory virus (PRRSV) isolates
Source: PubMed Central journal article supplement (PMC4367851; doi:10.1186/s13567-015-0166-3), 2015-03-21
Supplement: 13567_2015_166_MOESM1_ESM.pdf [file 13567_2015_166_MOESM1_ESM.pdf]

| Parameter                 | Criteria                                                                                        | Score |
|---------------------------|-------------------------------------------------------------------------------------------------|-------|
| Breathing                 | Normal (<40/minute)                                                                             | 0     |
|                           | Increased frequency (40-60/minute), snoring, barely visible chest movement                      | 1     |
|                           | Increased frequency (60-80 per minute), snoring, distinct chest and abdominal movement          | 2     |
|                           | Increased frequency (>80 per minute), problems breathing, panting, breathing through open mouth | 3     |
| Sneezing                  | No sneezing                                                                                     | 0     |
|                           | Mild (<2 in 3 minutes observation)                                                              | 1     |
|                           | Severe (>2 in 3 minutes observation)                                                            | 2     |
| Coughing                  | No coughing                                                                                     | 0     |
|                           | Mild (<2 in 3 minutes observation)                                                              | 1     |
|                           | Severe (>2 in 3 minutes observation)                                                            | 2     |
| Nasal discharge           | No nasal discharge                                                                              | 0     |
|                           | Clear nasal discharge                                                                           | 1     |
|                           | Discolored nasal discharge                                                                      | 2     |
| Liveliness                | No abnormalities                                                                                | 0     |
|                           | Slightly reduced                                                                                | 1     |
|                           | Tired, gets up only when forced                                                                 | 2     |
|                           | Dormant, will not stand up                                                                      | 3     |
| Discoloration of the ears | Normal                                                                                          | 0     |
|                           | Discolored skin of the ears: red, pale, gray or yellow                                          | 1     |
|                           | Blue-purple discoloration of the ears                                                           | 2     |
|                           | Ear necrosis                                                                                    | 3     |
| Eyes                      | Normal                                                                                          | 0     |
|                           | Conjunctivitis                                                                                  | 1     |
|                           | Non-purulent secretion                                                                          | 2     |
|                           | Purulent secretion                                                                              | 3     |
|                           | Peri-ocular oedema                                                                              | 4     |
| Digestive tract           | Normal                                                                                          | 0     |
|                           | Diarrhea                                                                                        | 1     |
|                           | Diarrhea with blood and/or fibrin                                                               | 2     |
